# Supplementary material
Source: PubMed Central journal article supplement (PMC1276048)

# IWe [I]

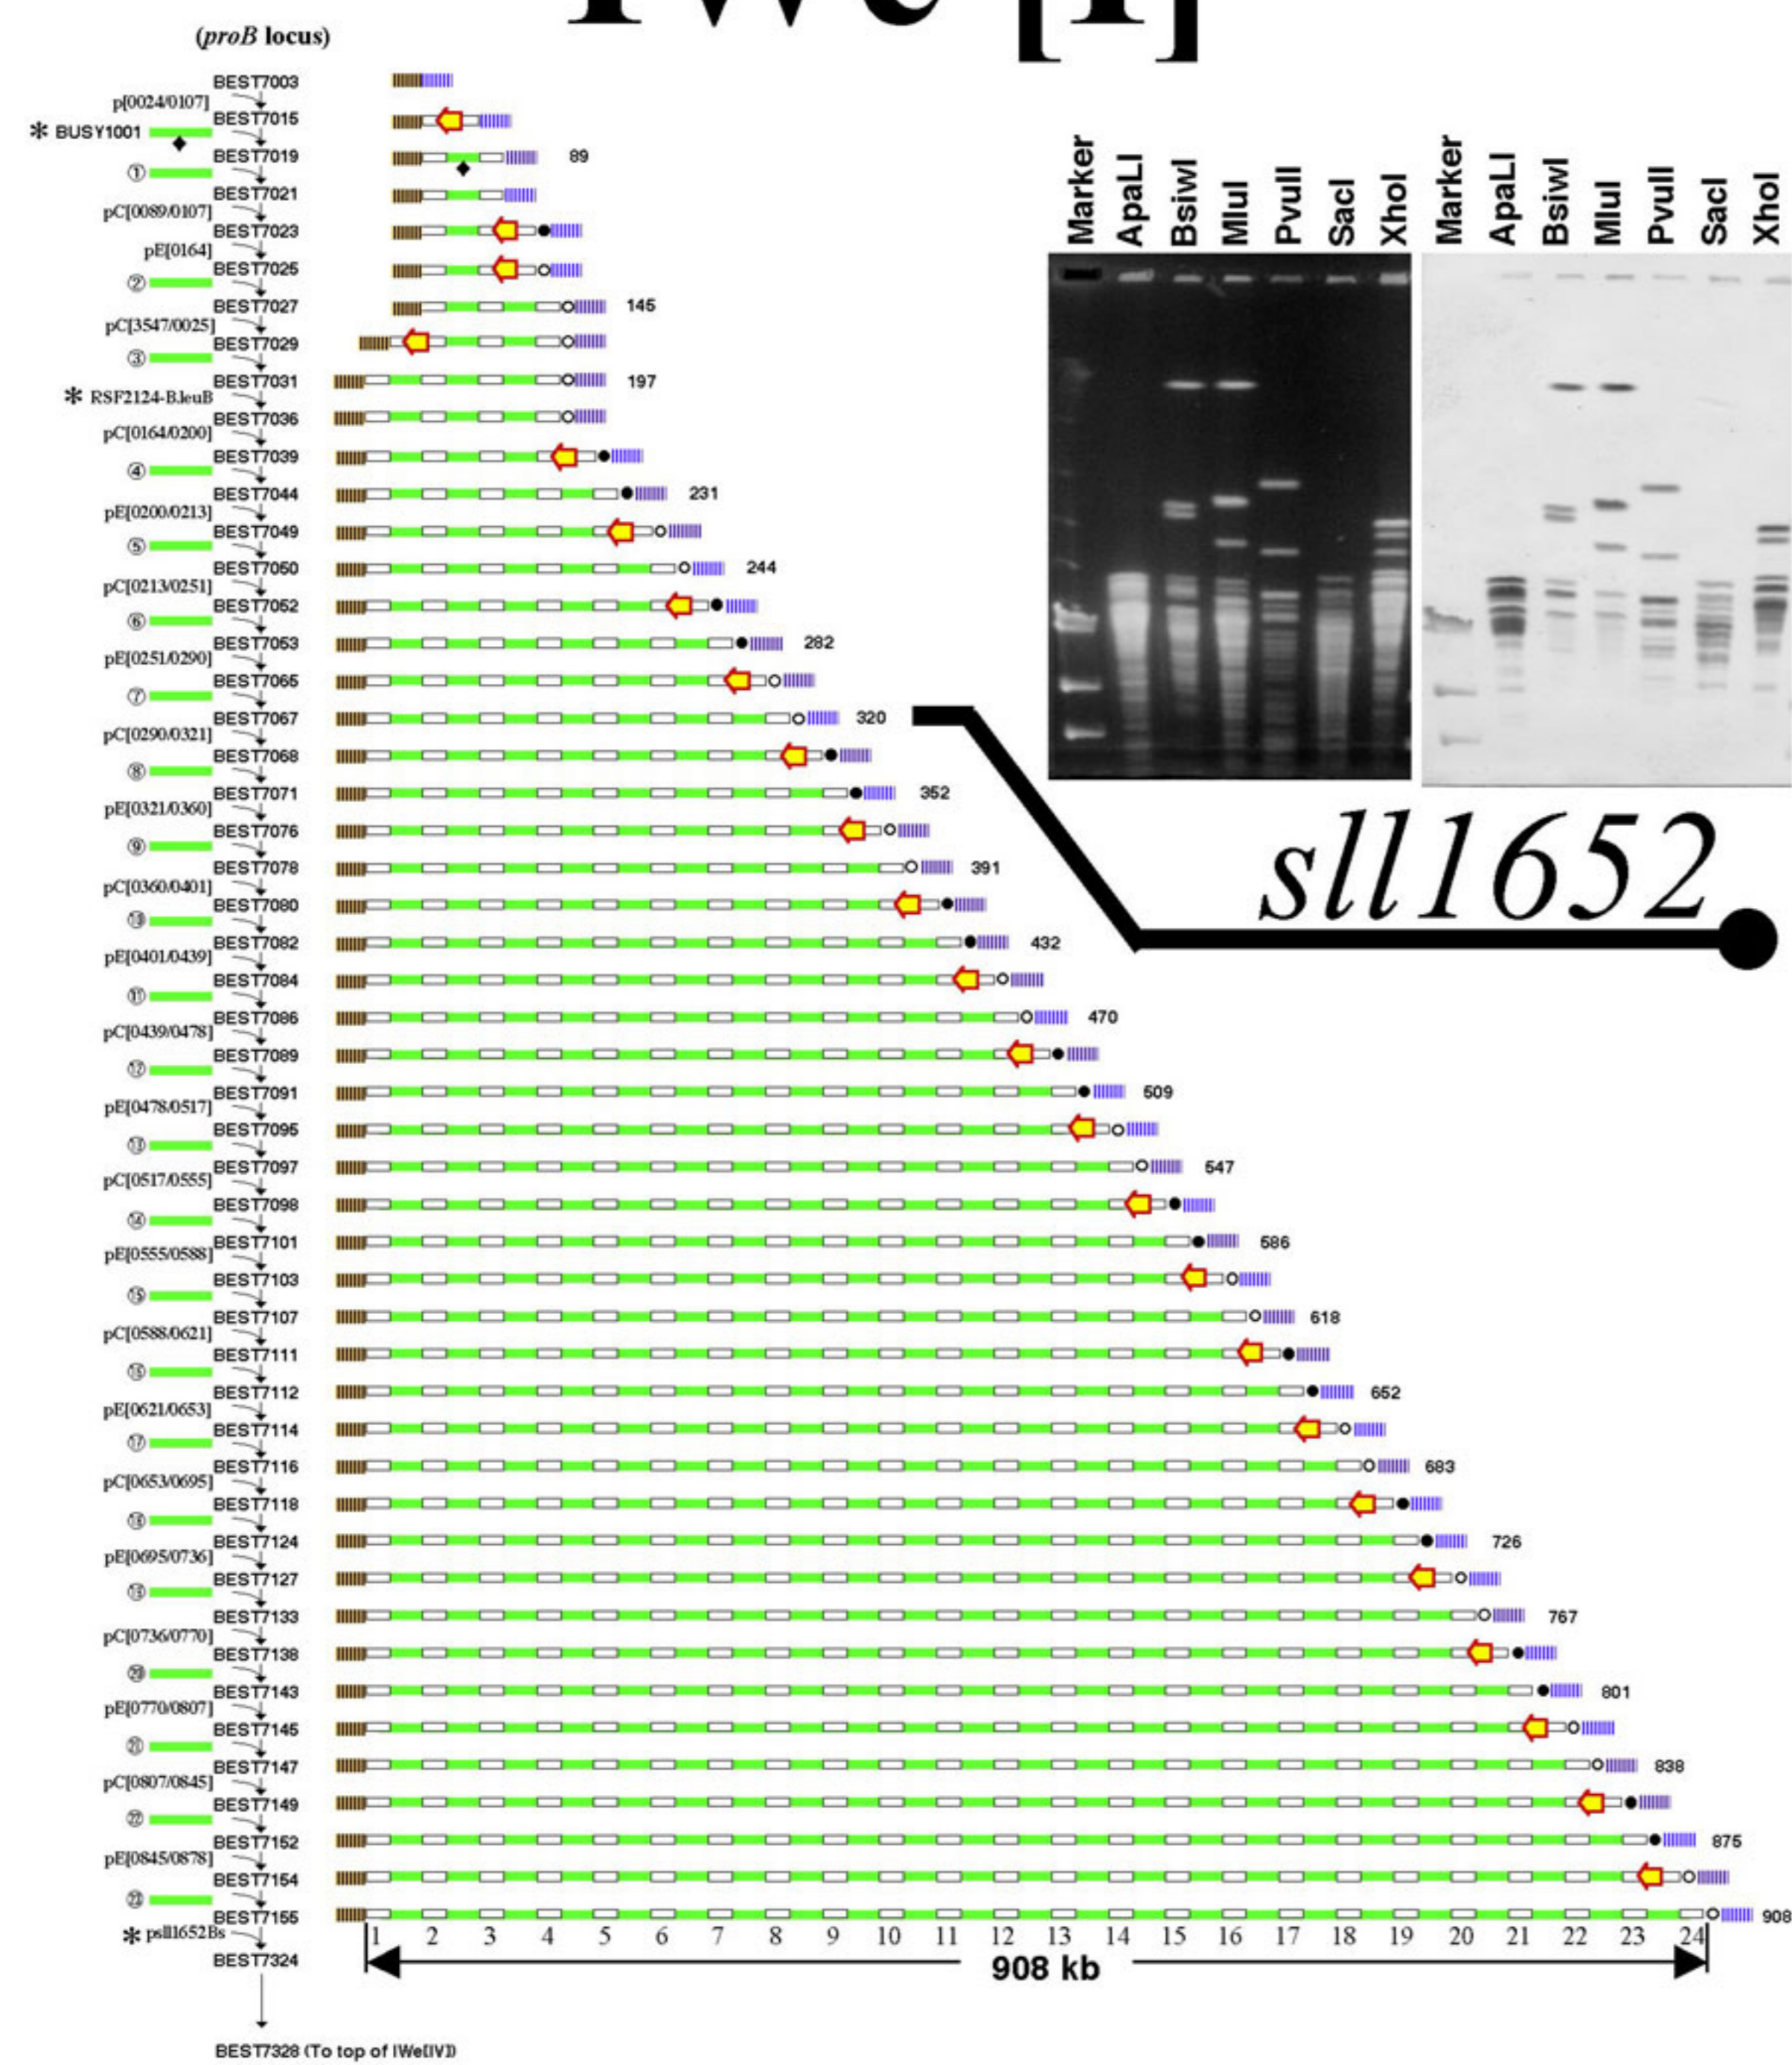

*sll1652*

# IWe [II]

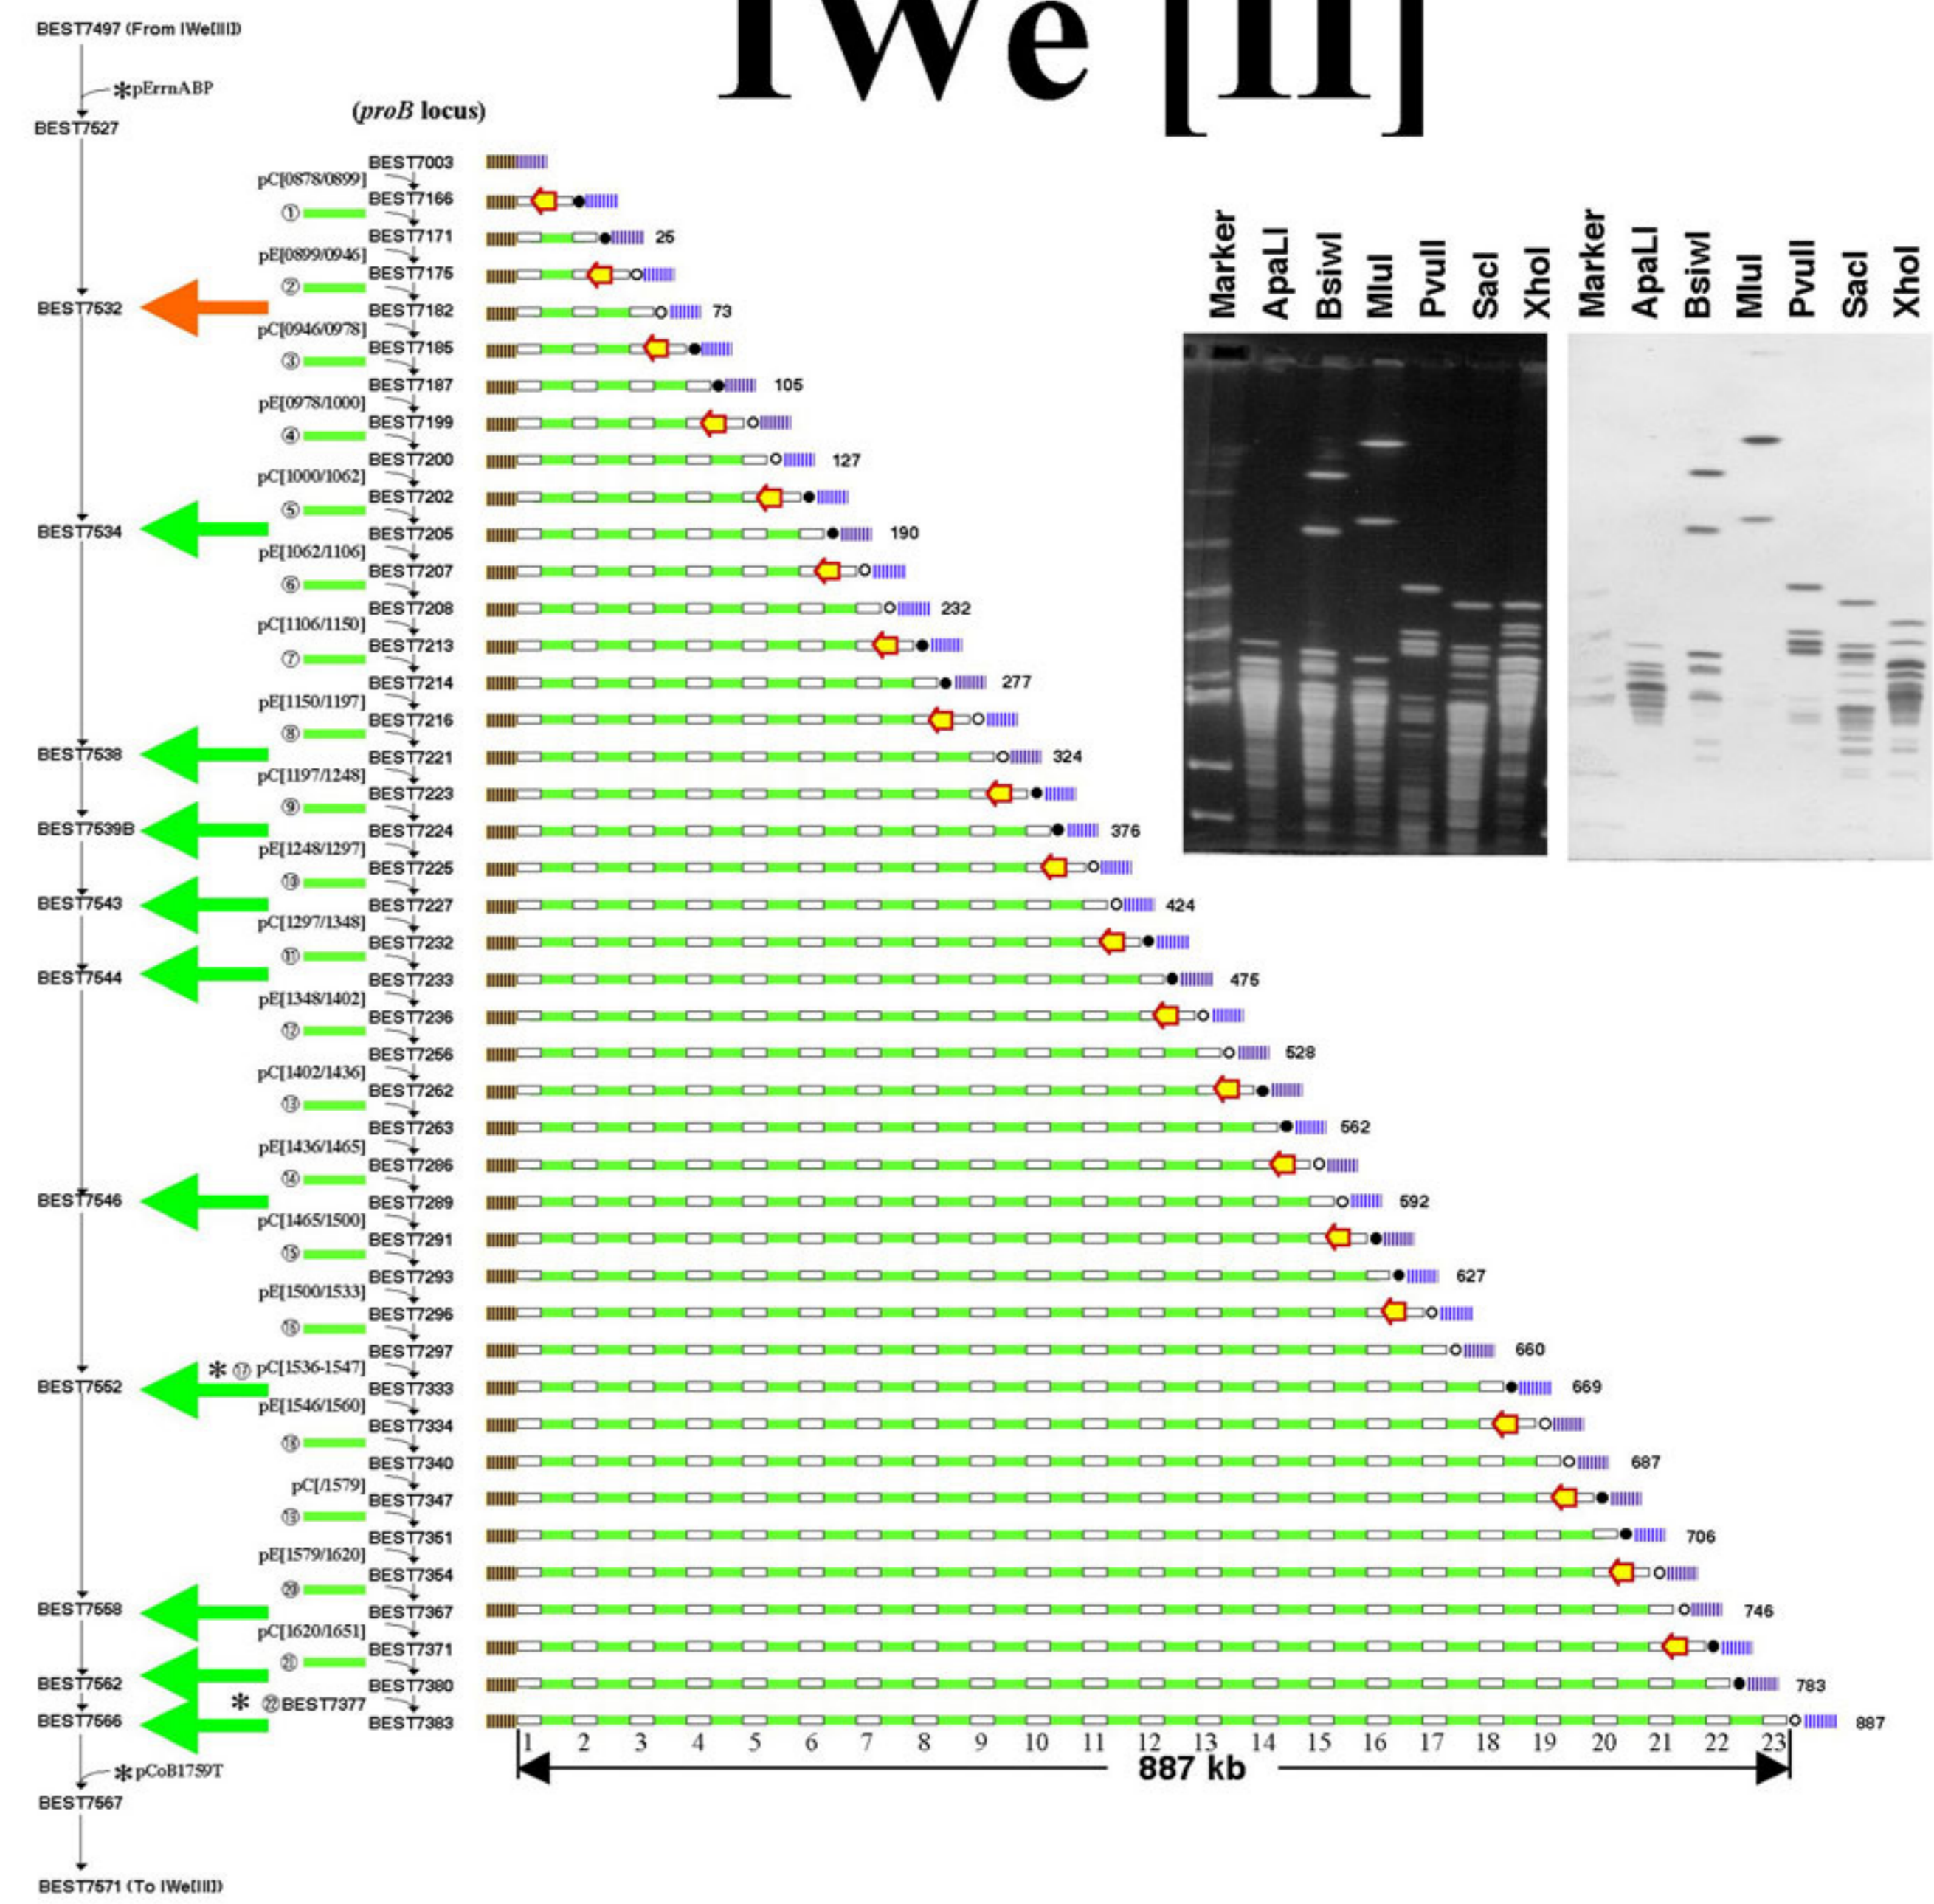

# IWe [III]

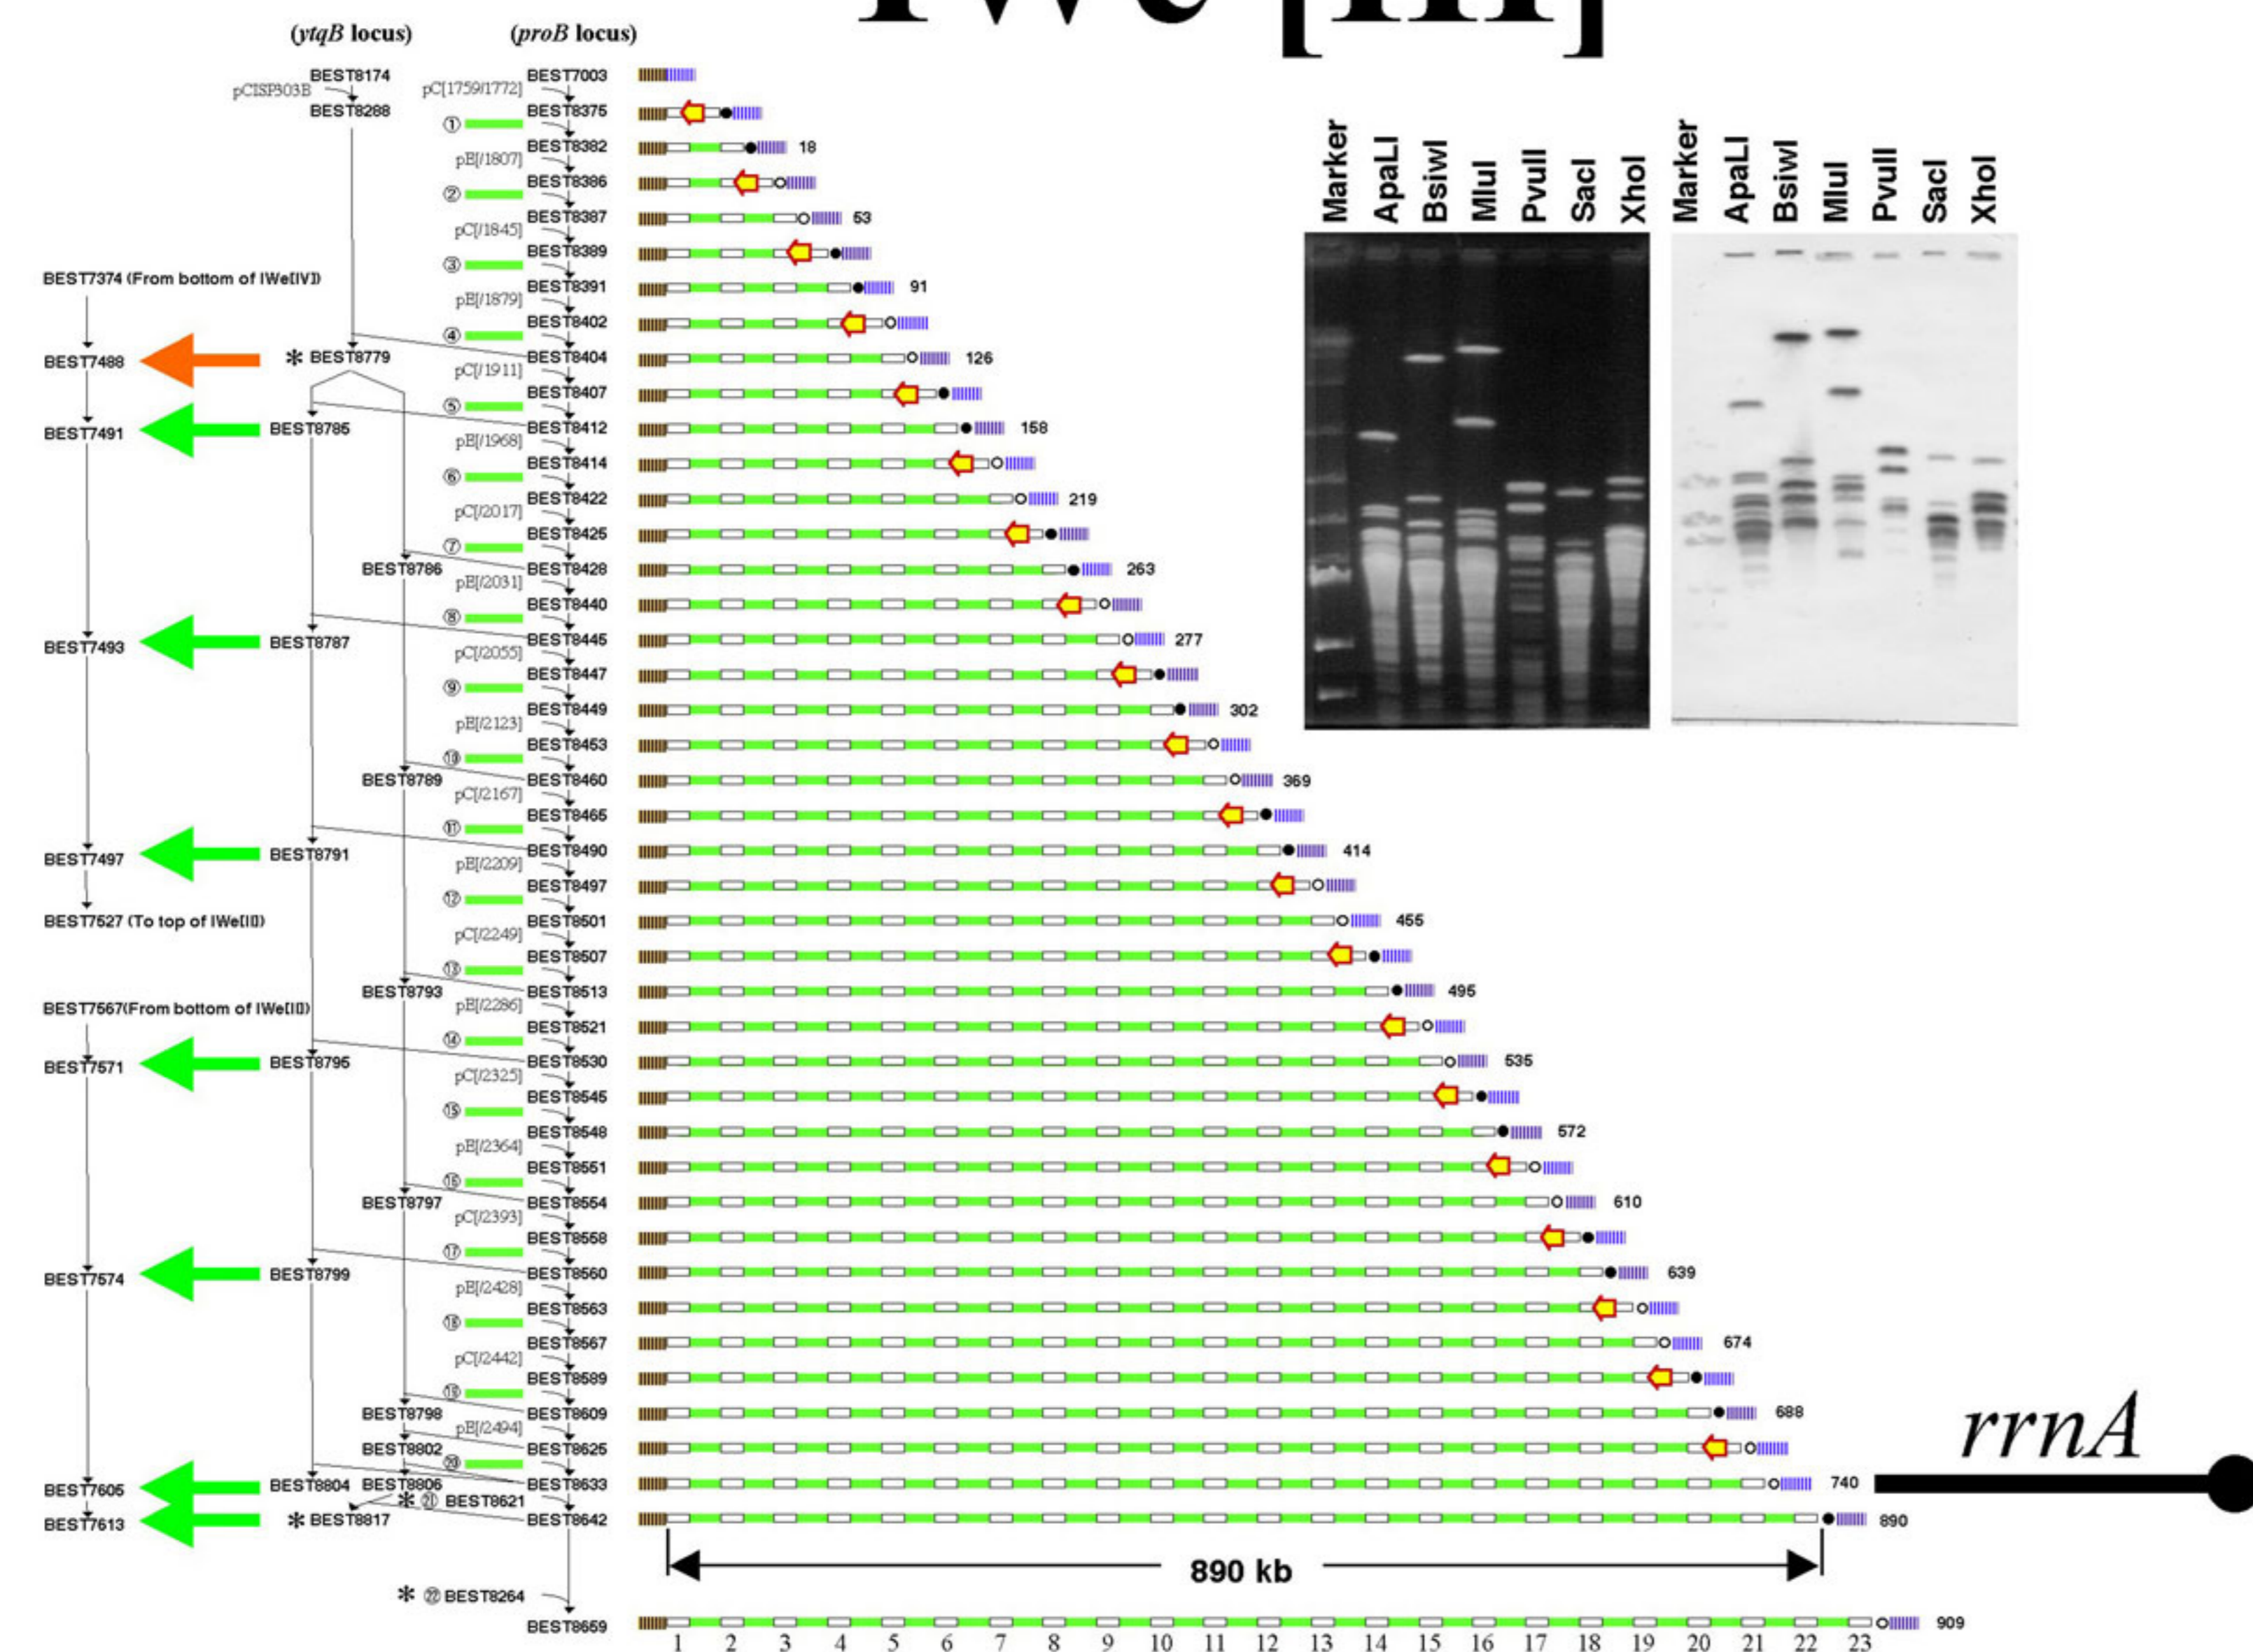

*rrnA*

# IWe [IV]

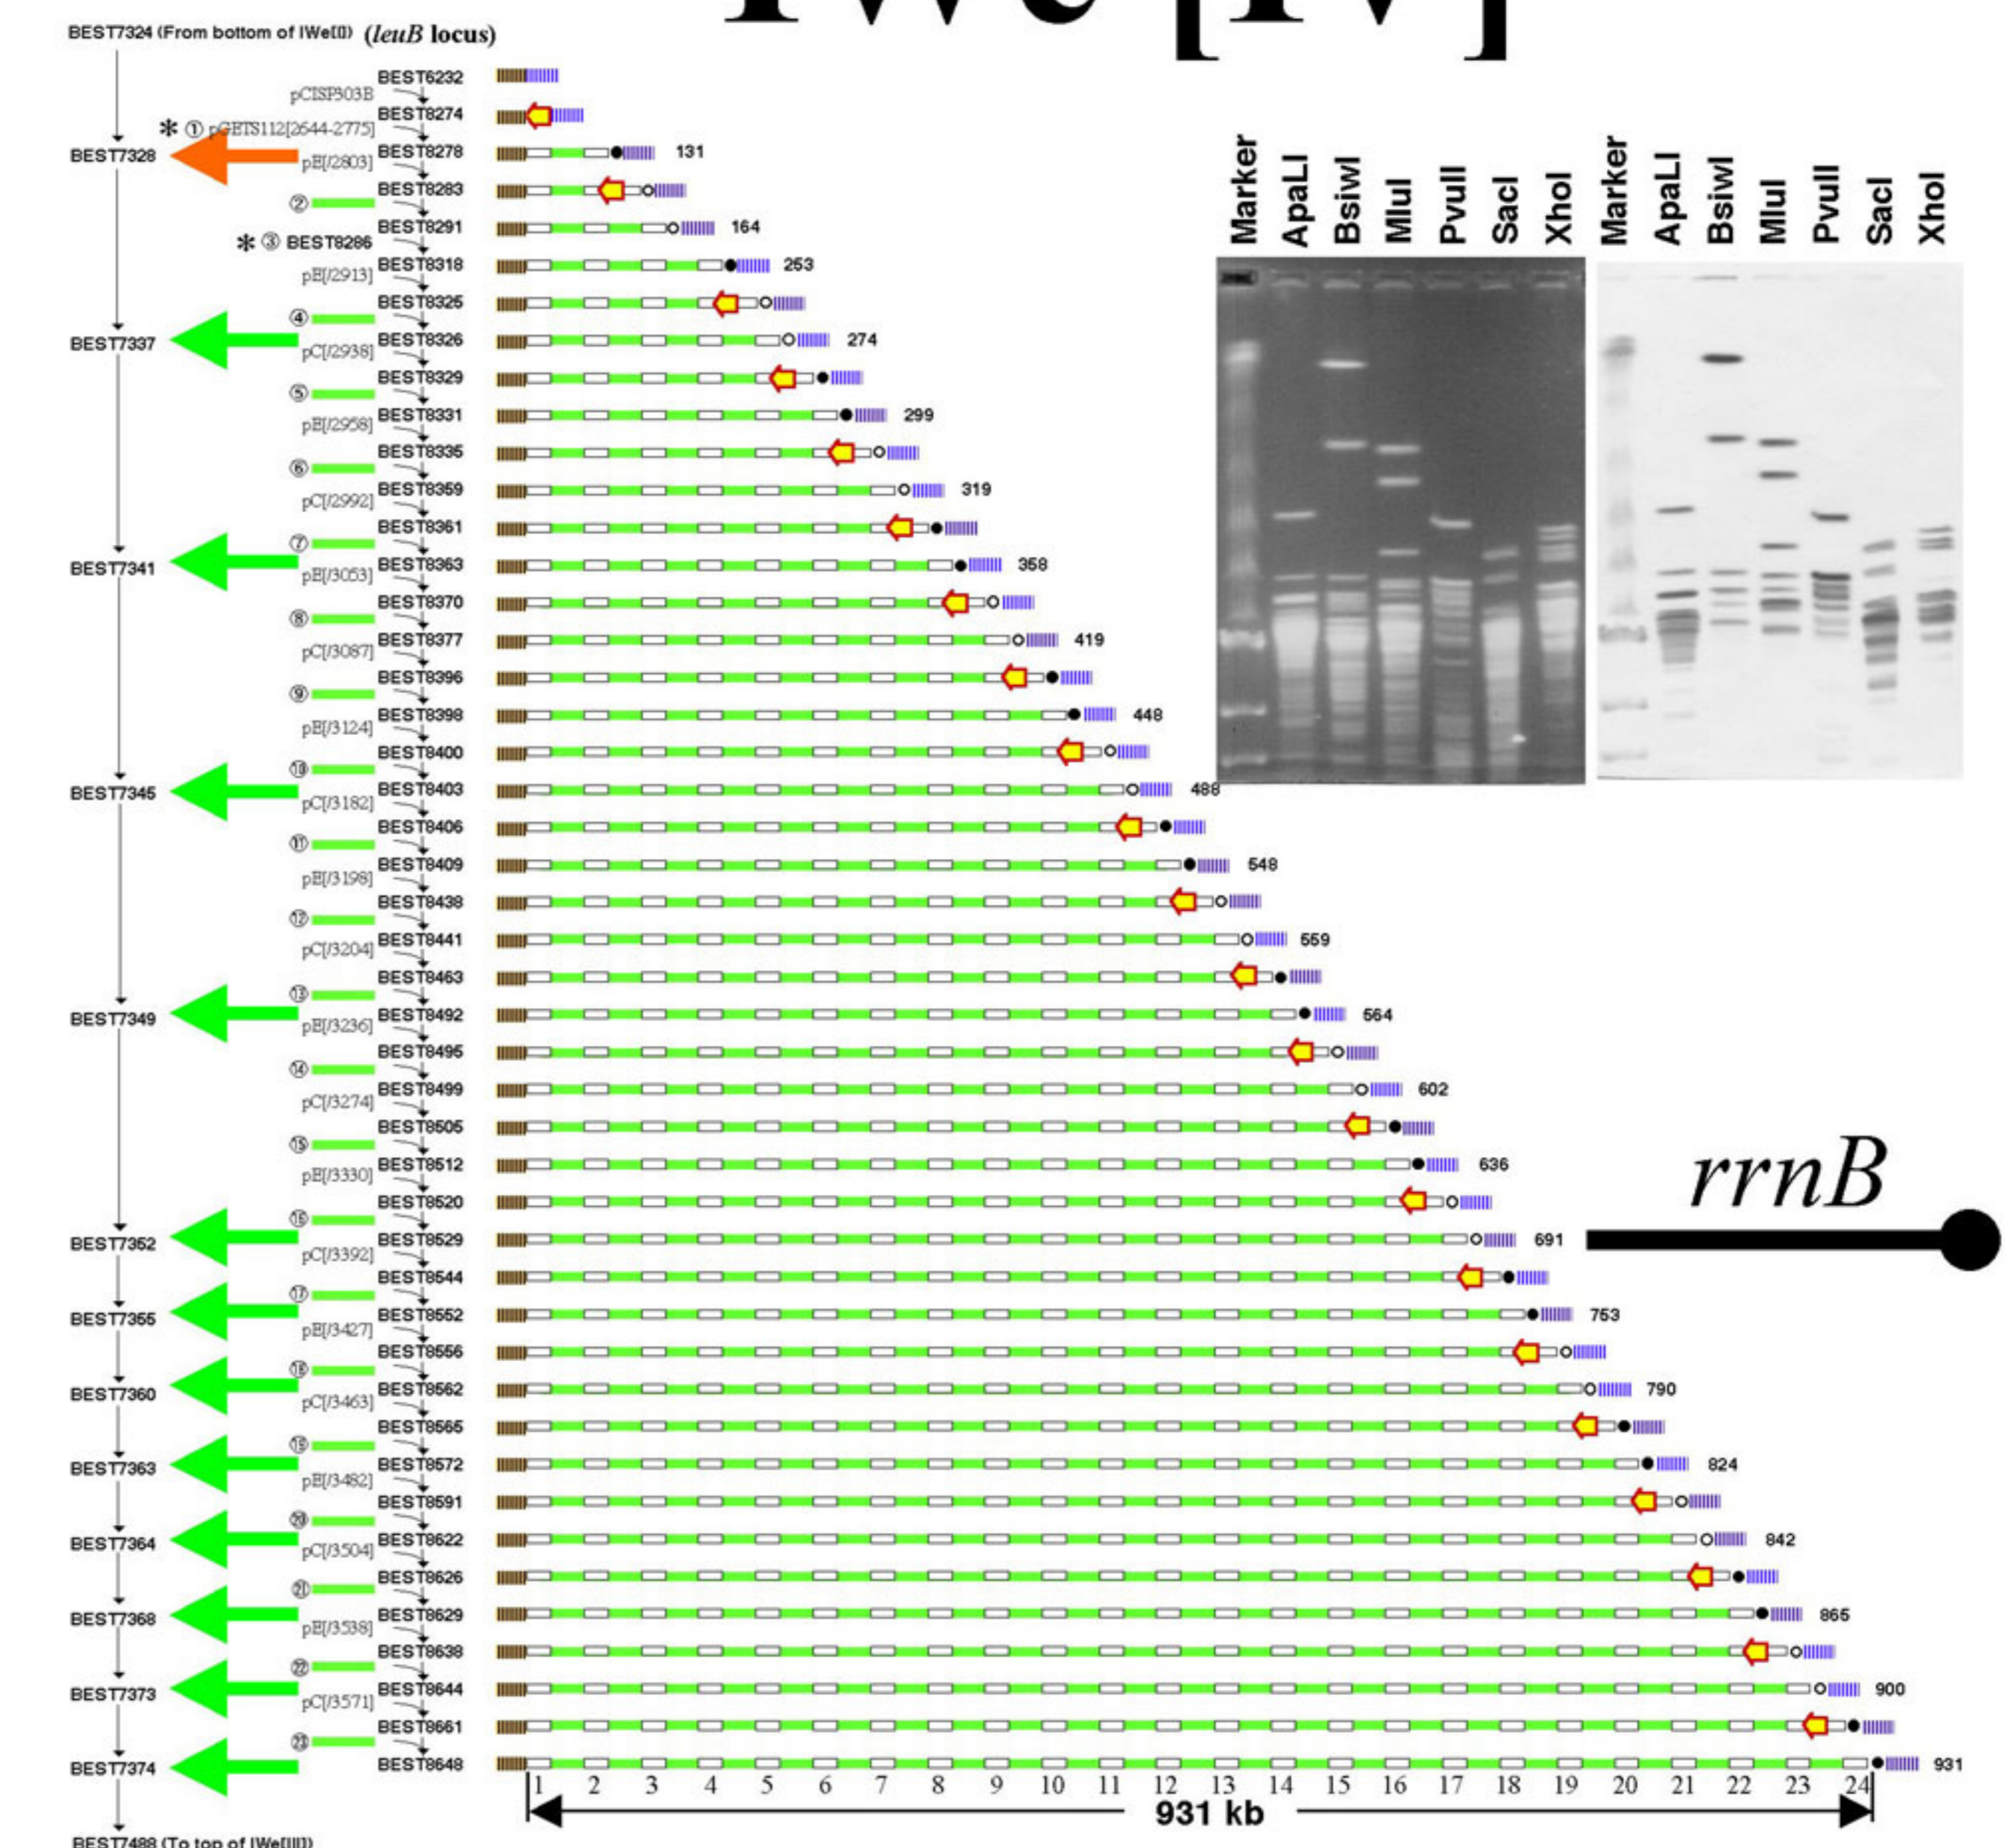

*rrnB*

Supplement: pnas_0503868102_1.pdf [file pnas_0503868102_1.pdf]
